# Supplementary material
Source: PubMed Central journal article supplement (PMC7790508)

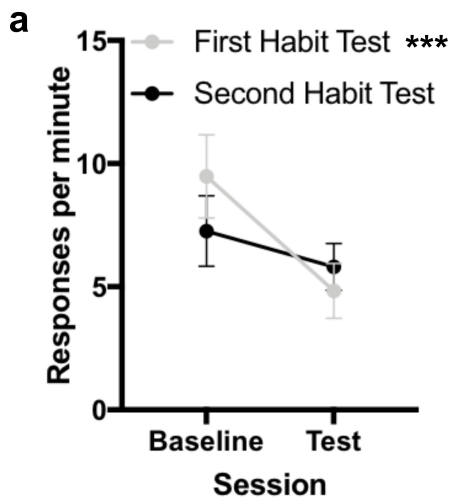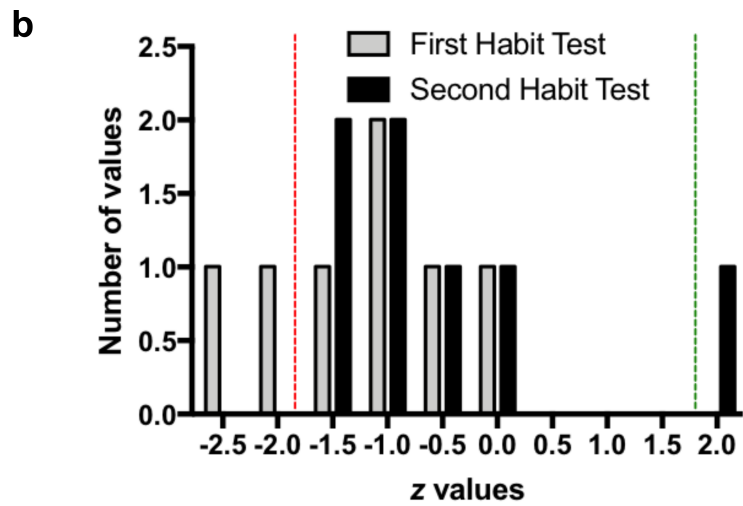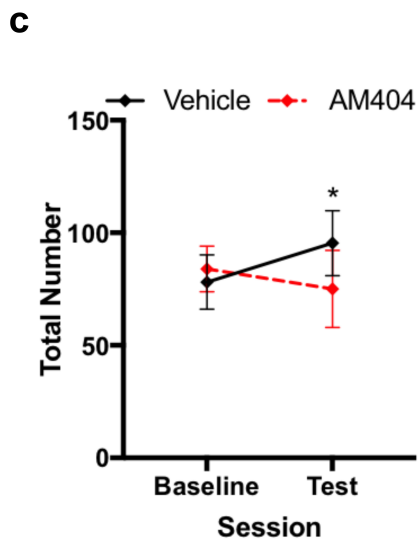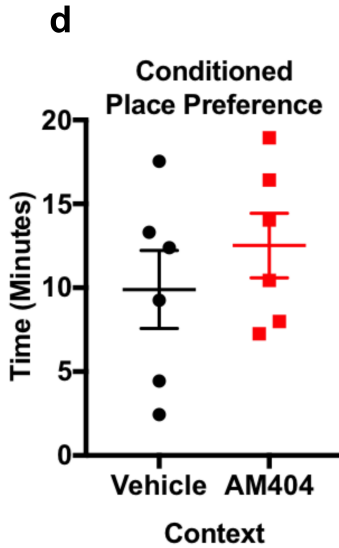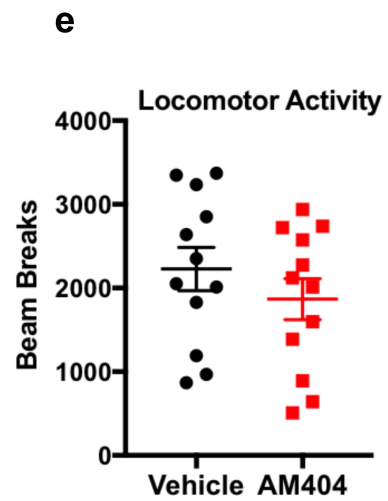

Supplement: NIHMS1652885-supplement-Supplementary_Figure_1.pdf [file NIHMS1652885-supplement-Supplementary_Figure_1.pdf]

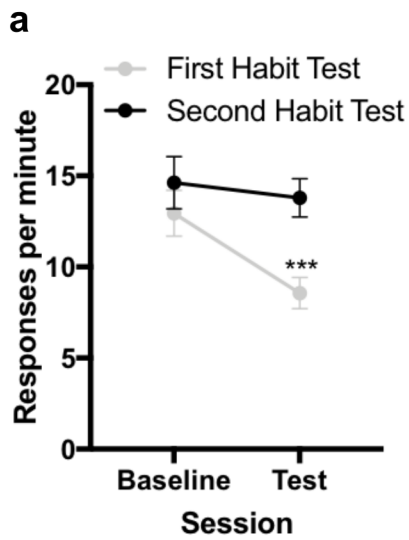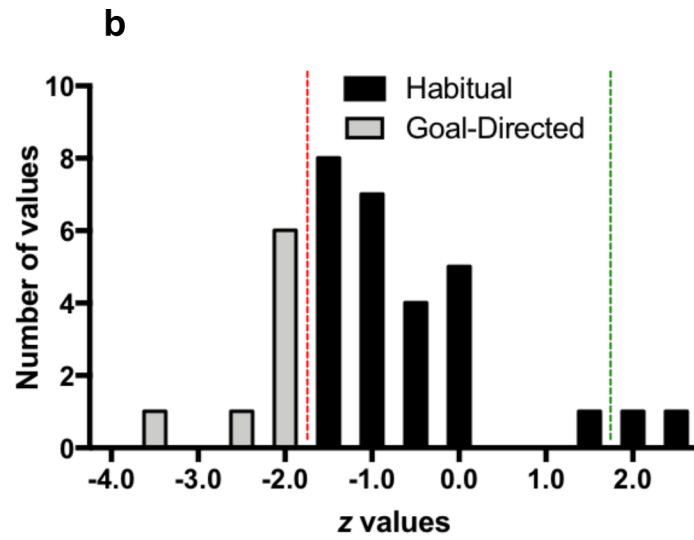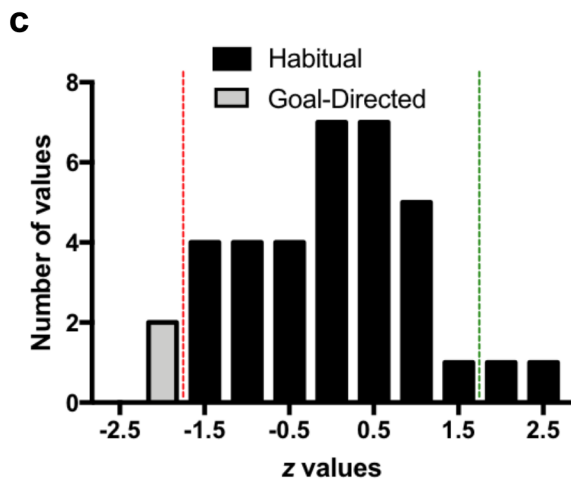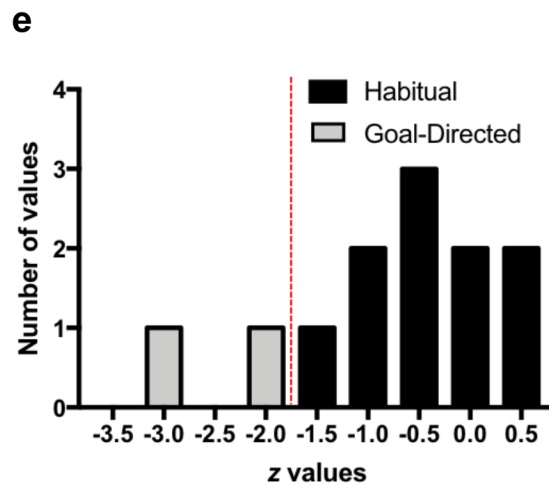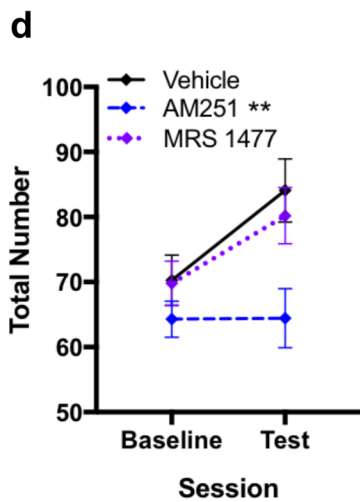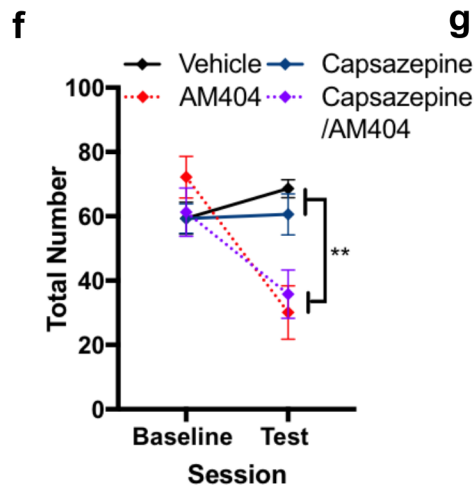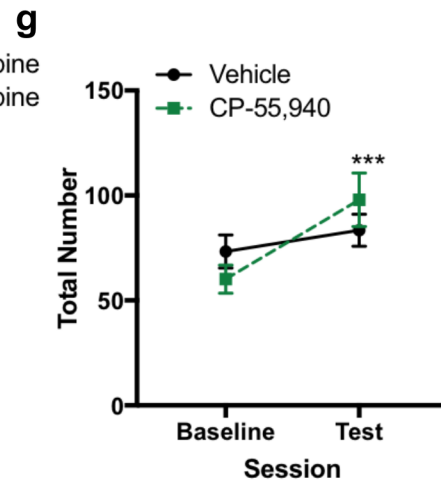

Supplement: NIHMS1652885-supplement-Supplementary_Figure_2.pdf [file NIHMS1652885-supplement-Supplementary_Figure_2.pdf]

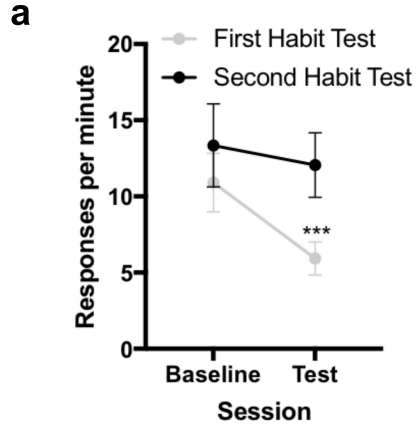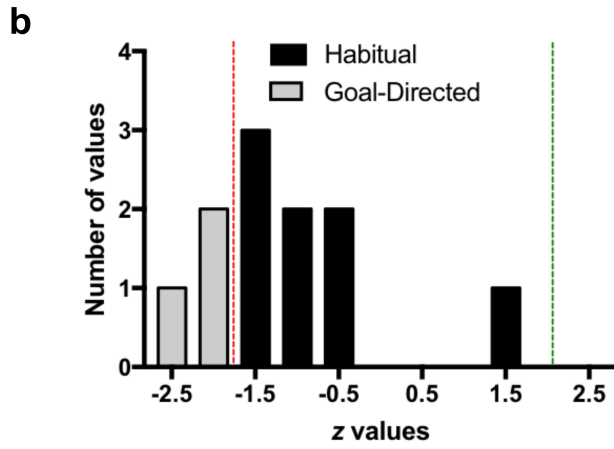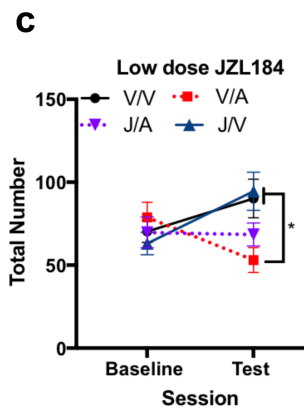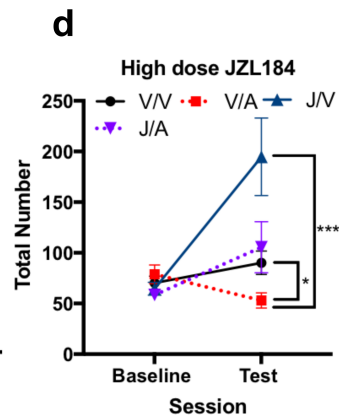

Supplement: NIHMS1652885-supplement-Supplementary_Figure_3.pdf [file NIHMS1652885-supplement-Supplementary_Figure_3.pdf]
